# Supplementary material for: Prehospital early warning scores for adults with suspected sepsis: retrospective diagnostic cohort study
Source: HighWire-hosted journal article supplement (doi:10.1136/emermed-2023-213315), 2023-09-06
Supplement: emermed-2023-213315supp001_data_supplement.pdf [file emermed-2023-213315supp001_data_supplement.pdf]

## Supplementary Appendix 1: Categorisation of diagnostic impressions

| Category | Diagnostic impression                                                                                                                                                                                                                                                                                                                                                                                                                                                                                                                                                                                                                                                                                                                                                                                                                                                                                                                     |
|----------|-------------------------------------------------------------------------------------------------------------------------------------------------------------------------------------------------------------------------------------------------------------------------------------------------------------------------------------------------------------------------------------------------------------------------------------------------------------------------------------------------------------------------------------------------------------------------------------------------------------------------------------------------------------------------------------------------------------------------------------------------------------------------------------------------------------------------------------------------------------------------------------------------------------------------------------------|
| 1        | Sepsis                                                                                                                                                                                                                                                                                                                                                                                                                                                                                                                                                                                                                                                                                                                                                                                                                                                                                                                                    |
| 2        | Cold & flu, Febrile illness, Meningitis, Pyrexia of unknown origin, Chest infection-pneumonia, UTI                                                                                                                                                                                                                                                                                                                                                                                                                                                                                                                                                                                                                                                                                                                                                                                                                                        |
| 3        | Catheter problems, COPD, Convulsion/Fitting, Collapse-reason unknown, Confused/distressed/upset, Diarrhoea/Constipation, Dizzy/near faint/ loss of coordination, Shortness of Breath, Generally unwell, Haematuria, Headache, Hypotension, Other medical condition, Urinary Retention, Shock (hypovolemic), Transient Loss of Consciousness, Unconscious, Vomiting                                                                                                                                                                                                                                                                                                                                                                                                                                                                                                                                                                        |
| 4        | Abdominal pain, Alcohol related, Allergic reaction/rash, Anaphylactic shock, AAA, Asthma, Bite/sting, Bleeding PR, Bleeding PV, Cardiac arrest, Cardiac STEMI, Cardiac chest pain (ACS), Cardiac NSTEMI, Choking, Carbon monoxide poisoning, Dental, Drug overdose, End of life care / Palliative, Epileptic fit, Epistaxis, Eye injury/eye problem, Falls, Gynaecological, Haematemesis, Haemoptysis, Haemorrhage/lacerations, Hyperglycaemia, Hypertension, Hypoglycaemia, Neurological problems, Pain – back non-traumatic, Pain – other, Panic attack, Poisoning, Pulmonary embolism, Rape/sexual assault, Pneumothorax (spontaneous), Renal problems/colic, Respiratory arrest, Seizures (non-EP), Smoke inhalation, Solvent related, Stroke – FAST positive, Unable to cope, No injury or illness, Cardiac Arrhythmia, Vascular Emergency (Non AAA), Dead on EMS arrival - signs inconsistent with life, Resuscitation unsuccessful |
| Excluded | Burns, Drowning, Electrocutation, Fracture/possible fracture, Hanging, Head injury, Major trauma, Minor cuts & bruising, Minor injuries – other, Multiple injuries<br>Obstetric – BBA, Obstetric – birth imminent, Obstetric – miscarriage, Obstetric – normal labour, Obstetric – premature labour, Obstetric emergency (other), Psychiatric problems, Spinal injury, Sprain/strain/dislocation, Stabbed/shot/weapon wound, Wound Closure, Non accidental injury                                                                                                                                                                                                                                                                                                                                                                                                                                                                         |

## Supplementary Appendix 2: Details of each early warning score

### 90-30-90

Dichotomous assessment, positive if any of the following criteria are met:

1. Systolic BP < 90mmHg
2. Respiratory rate > 30/minute
3. Oxygen saturation < 90%

#### Modification:

If the oxygen saturation is measured on supplemental oxygen, it is assumed to be < 90% on air (i.e. the criteria is positive).\*

#### Missing data:

Assume any missing criterion is negative/normal.

### The Borelli strategy

Dichotomous assessment, positive if three or more criteria are met:

- Respiratory rate > 20/minute
- Heart rate > 90/minute
- Systolic BP < 90 mmHg
- Documented fever or temperature >38.3°C or <36°C
- New onset of mental status change
- O<sub>2</sub> saturation < 90%
- Suspected infection

#### Modification:

Documented fever or temperature >38.3°C or <36°C, is effectively just temperature >38.3°C or <36°C

New onset of mental status change assumed if the GCS verbal scale is <5. If the GCS verbal scale is missing, then mental status change is assumed if GCS<15 or AVPU<A.

If the oxygen saturation is measured on supplemental oxygen, it is assumed to be < 90% on air (i.e. the criteria is positive).

#### Missing data:

Assume any missing variable is negative

## Critical illness score (CIS)

| Score            | 0     | 1            | 2   |
|------------------|-------|--------------|-----|
| Respiratory Rate | 12-23 | <12 or 24-35 | >35 |
| Heart Rate       | <120  | ≥120         |     |
| Systolic BP      | >90   | ≤90          |     |
| Age              | <45   | ≥45          |     |
| SpO2             | ≥88   | <88          |     |
| GCS              | 15    | 8-14         | <8  |

Thresholds of >4 or >0 are suggested, depending upon whether specificity or sensitivity are to be optimised

## Modification:

If the oxygen saturation is measured on supplemental oxygen, it is assumed to be < 88% on air (i.e. scores 1 point).

## Missing data:

Assume any missing variable scores zero.

## Hamilton Early Warning Score (HEWS)

| Score             | 3     | 2     | 1         | 0         | 1                                | 2       | 3                              |
|-------------------|-------|-------|-----------|-----------|----------------------------------|---------|--------------------------------|
| Respiratory Rate  | <8    | 8-13  |           | 14-20     |                                  | 21-30   | >30                            |
| Oxygen saturation | <85   |       | 85-91     | >91       |                                  |         |                                |
| Heart Rate        |       | <40   | 40-50     | 51-100    | 101-110                          | 111-130 | >130                           |
| Systolic BP       | <70   | 71-90 |           | 91-170    |                                  | 171-200 | >200                           |
| Temperature       | <35.0 |       | 35.1-36.4 | 36.5-38.0 | 38.1-39.0                        | >39.0   |                                |
| Neurology         |       |       |           | Alert     | Voice                            | Pain    | Unresponsive                   |
| Air or Oxygen     |       |       |           | Air       | ≤ 5 L/min<br>or ≤ 50%<br>by mask |         | >5 L/min or<br>>50% by<br>mask |

\*CAM positive removed as not routinely recorded

Threshold > 4

Modification:

If AVPU is missing, infer from GCS.

If on oxygen but amount unknown, score 2 points

Missing data:

Assume any missing variable scores zero

### Modified Early Warning Score (MEWS)

MEWS has five parameters, each of which are scored from zero to two or three providing an overall score between zero and 14.

| Score            | 3   | 2     | 1      | 0         | 1       | 2       | 3            |
|------------------|-----|-------|--------|-----------|---------|---------|--------------|
| Respiratory Rate |     | <9    |        | 9-14      | 15-20   | 21-29   | ≥30          |
| Heart Rate       |     | ≤40   | 41-50  | 51-100    | 101-110 | 111-129 | ≥130         |
| Systolic BP      | ≤70 | 71-80 | 81-100 | 101-199   |         | ≥200    |              |
| Temperature      |     | <35.0 |        | 35.0-38.4 |         | ≥38.5   |              |
| AVPU             |     |       |        | Alert     | Voice   | Pain    | Unresponsive |

A threshold of 5 or more has been shown to be associated with an increased risk of death

#### Modification:

If AVPU missing, infer AVPU from GCS

#### Missing data:

Assume any missing variable scores zero.

## National Early Warning Score, version 2 (NEWS2)

The NEWS2 has seven parameters, each of which are scored from zero to three providing an overall score between zero and 20.

| Score             | 3     | 2                                                                     | 1         | 0         | 1         | 2       | 3                                    |
|-------------------|-------|-----------------------------------------------------------------------|-----------|-----------|-----------|---------|--------------------------------------|
| Respiratory Rate  | ≤8    |                                                                       | 9-11      | 12-20     |           | 21-24   | ≥25                                  |
| Oxygen saturation | ≤91   | 92-93                                                                 | 94-95     | ≥96       |           |         |                                      |
| Heart Rate        | ≤40   |                                                                       | 41-50     | 51-90     | 91-110    | 111-130 | ≥131                                 |
| Systolic BP       | ≤90   | 91-100                                                                | 101-110   | 111-219   |           |         | ≥220                                 |
| Temperature       | ≤35.0 |                                                                       | 35.1-36.0 | 36.1-38.0 | 38.1-39.0 | ≥39.1   |                                      |
| Neurology         |       |                                                                       |           | Alert     |           |         | Confusion, Voice, Pain, Unresponsive |
| Air or Oxygen     |       | Oxygen (based on FiO <sub>2</sub> >21%, or FiO <sub>2</sub> >0 L/min) |           | Air       |           |         |                                      |

We will not use the scale for patients with confirmed hypercapnic respiratory failure.

## Modification:

If AVPU is missing, infer AVPU from GCS

## Missing data:

Assume any missing variable scores zero.

## NHS pre-alert

Pre-alert if any of the following are present:

- Respiratory rate  $\leq 8$  or  $\geq 25$
- O<sub>2</sub> saturations on oxygen  $< 92\%$  (Patients usually running normal oxygen saturations)  $< 84\%$  (Patients with chronic hypercapnic respiratory failure)
- Systolic  $< 90$ mmHg OR downward-trending systolic where symptomatic
- Tachycardia  $\geq 131$
- GCS motor  $< 4$

Sepsis red flag criteria evaluated as part of UK Sepsis Trust criteria

Modification:

Drop  $< 84\%$  oxygen saturation threshold for patients with chronic hypercapnic respiratory failure

Drop downward-trending systolic where symptomatic

Missing data:

Assume any missing criterion is negative



### Prehospital ANTibiotics Against Sepsis (PHANTASi)

Dichotomous assessment, positive if both the following criteria are met:

1. Temperature  $>38^{\circ}\text{C}$  or  $< 36^{\circ}\text{C}$
2. Heart rate  $> 90$  beats per minute or respiratory rate  $> 20$  per minutes

Modification:

None required

Missing data:

Assume any missing variable is negative/normal.

Paramedic Initiated Treatment of Sepsis Targeting Out-of-hospital Patients clinical trial (PITSTOP)

Dichotomous assessment, positive if all the following three criteria are met:

1. Paramedic suspects possible infection
2. Temperature  $\geq 38.0$  °C
3. Systolic BP < 100mmHg

Modification:

None required

Missing data:

Assume any missing criterion is negative/normal.

### Prehospital Sepsis Assessment Tool (PreSAT)

Dichotomous assessment, positive if both the following criteria are met:

1. Presentation suggestive of infection
2. Any two from (a) temperature  $>38^{\circ}\text{C}$  or  $<36^{\circ}\text{C}$ , (b) heart rate  $> 90/\text{min}$ , (c) respiratory rate  $> 20/\text{min}$ , (d) systolic BP  $< 90\text{mmHg}$

Modification:

None required

Missing data:

Assume any missing variable is negative/normal.

## Prehospital Early Sepsis Detection (PRESEP)

| Parameter              | Score |
|------------------------|-------|
| Temperature > 38°C     | 4     |
| Temperature < 36°C     | 1     |
| SaO <sub>2</sub> < 92% | 2     |
| RR > 22 breaths/min    | 1     |
| HR > 90 beats/min      | 2     |
| BP < 90 mm Hg          | 2     |

Recommended threshold >3

## Modification:

If the oxygen saturation is measured on supplemental oxygen, it is assumed to be < 92% on air (i.e. score 2 points).

## Missing data:

Assume any missing variable scores zero.

### Prehospital Severe Sepsis (PRESS)

The score is only applied to patients meeting all three of the following criteria, so patients not meeting these criteria should score zero:

- Heart rate >90/min
- Respiratory rate >20/min
- Systolic blood pressure BP <110 mmHg

| Score                         | 0       | 1     | 2     | 3     | 4     | 5   |
|-------------------------------|---------|-------|-------|-------|-------|-----|
| Age                           | <40     |       | ≥60   |       | 40-59 |     |
| SpO2                          | ≥90     | 80-89 |       | 70-79 | 60-69 | <60 |
| Systolic BP                   | 100-109 | 90-99 | 80-89 | 70-79 | 60-69 | <60 |
| Hot tactile temperature       |         |       |       | X     |       |     |
| ED chief concern: sick person |         |       |       | X     |       |     |
| Nursing home transport        |         |       |       |       | X     |     |

Threshold > 1

#### Modification:

If the oxygen saturation is measured on supplemental oxygen, it is assumed to be < 90% on air and scored 2 points.

Infer hot tactile temperature from recorded temperature > 38°C

Drop ED chief concern sick person – address this through diagnostic impression

Drop nursing home transport

#### Missing data:

Assume any missing variable scores zero

## Prehospital Sepsis Project (PSP)

| Parameter                           | Score |
|-------------------------------------|-------|
| Temperature > 38°C                  | 1     |
| Heart rate / systolic BP $\geq$ 0.7 | 2     |
| Respiratory rate > 22/min           | 1     |

Low risk = 0-1 point, moderate risk = 2 points, high risk = 3-4 points

## Modification:

None required

## Missing data:

Assume missing temperature or respiratory rate scores zero.

Assume heart rate / systolic BP scores zero unless either (a) heart rate is > 100 and systolic BP is missing, or (b) systolic BP is <100 and heart rate is missing.

## qSOFA

| Parameter                  | Score |
|----------------------------|-------|
| GCS <15                    | 1     |
| Respiratory rate $\geq 22$ | 1     |
| Systolic BP $\leq 100$     | 1     |

Total score 0-3

Low risk = 0 or 1

High risk = 2 or 3

Modification:

None required

Missing data:

Assume any missing variable scores zero

## Rapid Emergency Medicine Score (REMS)

| Score            | 0      | 1                 | 2                   | 3                   | 4              | 5     | 6   |
|------------------|--------|-------------------|---------------------|---------------------|----------------|-------|-----|
| Age              | <45    |                   | 45-54               | 55-64               |                | 65-74 | >65 |
| MAP              | 70-109 |                   | 50-69 or<br>110-129 | 130-159             | >159 or<br><50 |       |     |
| Heart rate       | 70-109 |                   | 55-69 or<br>110-139 | 40-54 or<br>140-179 | <179 or<br><40 |       |     |
| Respiratory rate | 12-24  | 10-11 or<br>25-34 | 6-9                 | 35-49               | <6 or >49      |       |     |
| SpO2             | >89%   | 86-89%            |                     | 75-85%              | <75%           |       |     |
| GCS              | >13    | 11-13             | 8-10                | 5-7                 | 3-4            |       |     |

High risk (REMS  $\geq 3$ ): patient may need aggressive treatment

Low risk (REMS <3): patient may be appropriate to triage for routine treatment

## Modification:

If the oxygen saturation is measured on supplemental oxygen, it is assumed to be < 89% on air and scored 2 points.

## Missing data:

Assume any missing variable scores zero



### Robson Screening Tool (RST)

Dichotomous assessment, positive if presentation suggestive of infection and any two of:

1. Temperature  $> 38.3^{\circ}$  or  $< 36^{\circ}$
2. Heart rate  $> 90$  beats/min
3. Respiratory rate  $> 20$  breaths/min
4. Acutely altered mental status
5. Plasma glucose  $> 6.6$  mmol/l (unless diabetic)

#### Modification:

Criterion 5 applies regardless of whether they are diabetic

Acutely altered mental status change assumed if the GCS verbal scale is  $< 5$ . If the GCS verbal scale is missing, then acutely altered mental status is assumed if  $GCS < 15$  or  $AVPU = A$ .

#### Missing data:

Assume any missing criterion is negative

## Screening to Enhance Prehospital Identification of Sepsis (SEPSIS)

| Parameter        | -1   | 0              | 1                             | 2       |
|------------------|------|----------------|-------------------------------|---------|
| Age              |      | ≤60            | >60                           |         |
| Respiratory rate |      | ≤20 or >60     | 21-40                         | 40-60   |
| SpO2             |      | ≥94            | <94                           |         |
| Heart rate       |      | ≤100           | 101-140                       | 141-160 |
| Systolic BP      | >160 | <60 or 100-160 | 60-99                         |         |
| GCS              |      | 13-15          | 3-12                          |         |
| Temperature      |      | <37.5          | 37.5 to 39.5                  | >39.5   |
| Skin             |      |                | Jaundice, pallor,<br>mottling |         |

High risk if score > 4

Modification:

Skin features dropped from the score (not recorded on ePFR)

Missing data:

Assume any missing variable scores zero

Give 1 point if SpO2>94% on oxygen

## Sepsis Alert

At least two systematic inflammatory response syndrome (SIRS) criteria:

- Temperature > 38C or < 36C
- Pulse > 90 beats/min
- Respiratory rate > 20 breaths/min or mechanically ventilated

And

Suspected or documented infection

And

Hypoperfusion, as manifested by one of the following:

- Systolic BP < 90 mm Hg
- Mean arterial pressure < 65 mm Hg
- Lactate level  $\geq$  4 mmol/L

Modification:

Drop lactate level  $\geq$  4 mmol/L

Missing data:

Assume negative if missing

## Simple Triage Scoring System (STSS)

| Parameter                                    | Score |
|----------------------------------------------|-------|
| Age >65 yrs                                  | 1     |
| Altered mental status                        | 1     |
| Respiratory rate of >30 breaths/min          | 1     |
| Low oxygen saturation                        | 1     |
| Shock index of >1 (heart rate > systolic BP) | 1     |

## Modification:

Altered mental status change assumed if the GCS verbal scale is <5. If the GCS verbal scale is missing, then altered mental status is assumed if GCS<15 or AVPU<A.

Score 1 point for low oxygen saturation if oxygen saturation is <94% or measured on supplemental oxygen.

## Missing data:

Assume any missing variable scores zero

### Suffoletto strategy

Dichotomous assessment, positive if any of the following criteria are met:

- Systolic BP <100 mmHg
- History or suspicion of fever
- Prehospital judgment of infection

Modification:

Infer history or suspicion of fever from temperature >38

Missing data:

Assume any missing criterion is negative

### UK Sepsis Trust Red Flags

Any of the following gives a positive score:

- Objective evidence of new or altered mental state
- Systolic BP  $\leq$  90 mmHg (or drop of  $>40$  from normal)
- Heart rate  $\geq$  130 per minute
- Respiratory rate  $\geq$  25 per minute
- Needs O<sub>2</sub> to keep SpO<sub>2</sub>  $\geq$  92% (88% in COPD)
- Non-blanching rash / mottled / ashen / cyanotic
- Lactate  $\geq$  2 mmol/l
- Recent chemotherapy
- Not passed urine in 18 hours

#### Modification:

New or altered mental state assumed if the GCS verbal scale is  $<5$ . If the GCS verbal scale is missing, then new or altered mental state is assumed if GCS $<15$  or AVPU $<A$ .

Drop BP change from normal and just use systolic BP  $\leq$  90 mmHg

Simplify O<sub>2</sub> criteria to SpO<sub>2</sub>  $<$  92% or measured on supplemental oxygen

Drop non-blanching rash / mottled / ashen / cyanotic

Drop lactate  $\geq$  2 mmol/l

Drop recent chemotherapy

Drop not passed urine

#### Missing data:

Assume any missing criterion is negative.
